# Supplementary material for: Echinacoside-Zinc Nanomaterial Inhibits Skin Glycation by Suppressing the Transcriptional Activation of the Receptor for Advanced Glycation End-Products
Source: PubMed Central journal article supplement — ACS Nano. 2023 Jul 5;17(14):14123–35. doi: 10.1021/acsnano.3c04726 (PMC10373517; doi:10.1021/acsnano.3c04726), 2023-07-05
Supplement: nn3c04726_si_001.pdf [file nn3c04726_si_001.pdf]

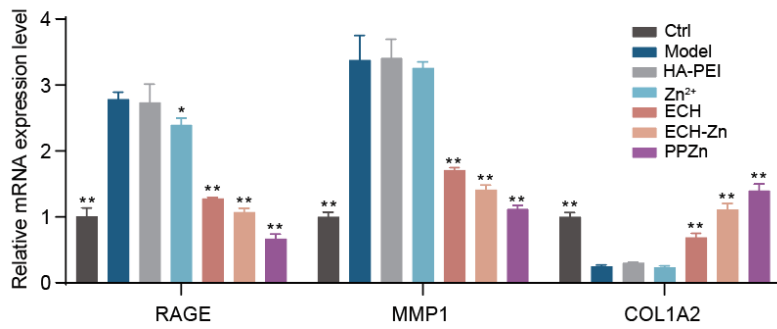

**Figure S1** qRT-PCR detection of RAGE, MMP1 and COL1A2 mRNA levels in HaCaT cells after indicated treatment. \* $P < 0.05$ , \*\* $P < 0.01$ , compared with model.

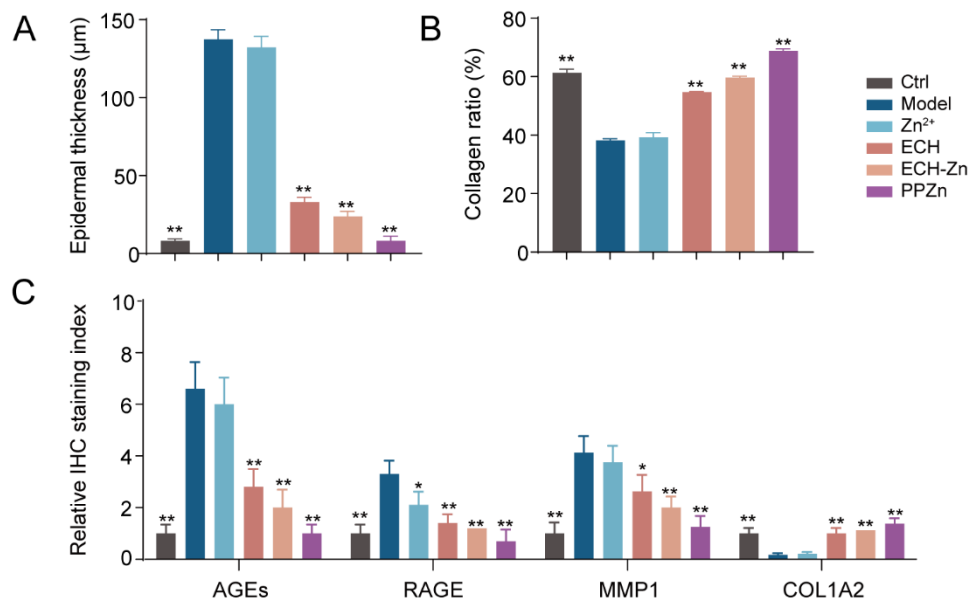

**Figure S2** Statistical graph of skin epidermal thickness (A), collagen ratio (B), and relative IHC staining index (C) in mice. \* $P < 0.05$ , \*\* $P < 0.01$ , compared with model.

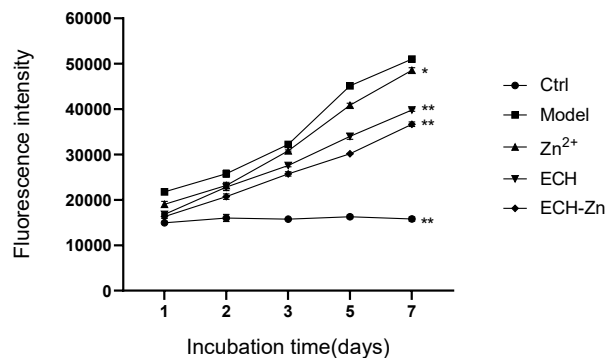

**Figure S3** Effects of Zn<sup>2+</sup>, ECH and ECH-Zn on the formation of AGEs in BSA-MGO system. \*\* $P < 0.01$ , compared with model.

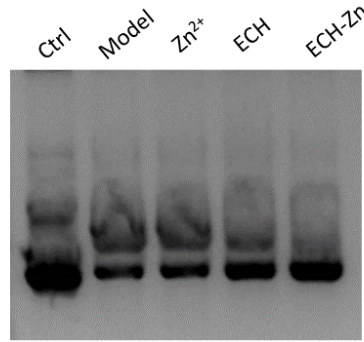

**Figure S4** Electropherogram of MGO damaged DNA (plasmid: PGL3-Basic) inhibited by  $Zn^{2+}$ , ECH and ECH-Zn.

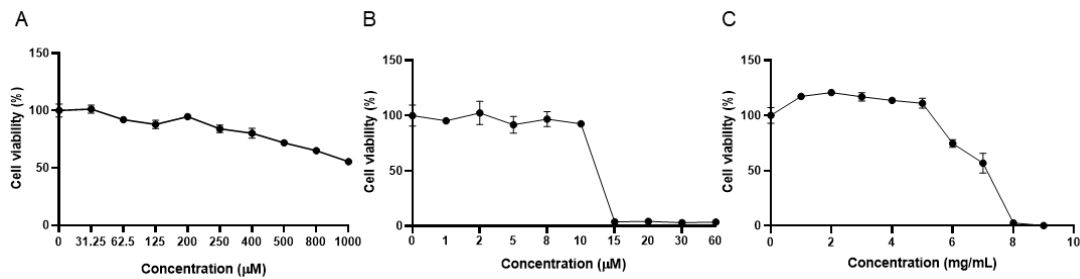

**Figure S5** CCK8 results for ECH (A),  $Zn^{2+}$  (B), and PPZn (C). Left: ECH; Right: PPZn.

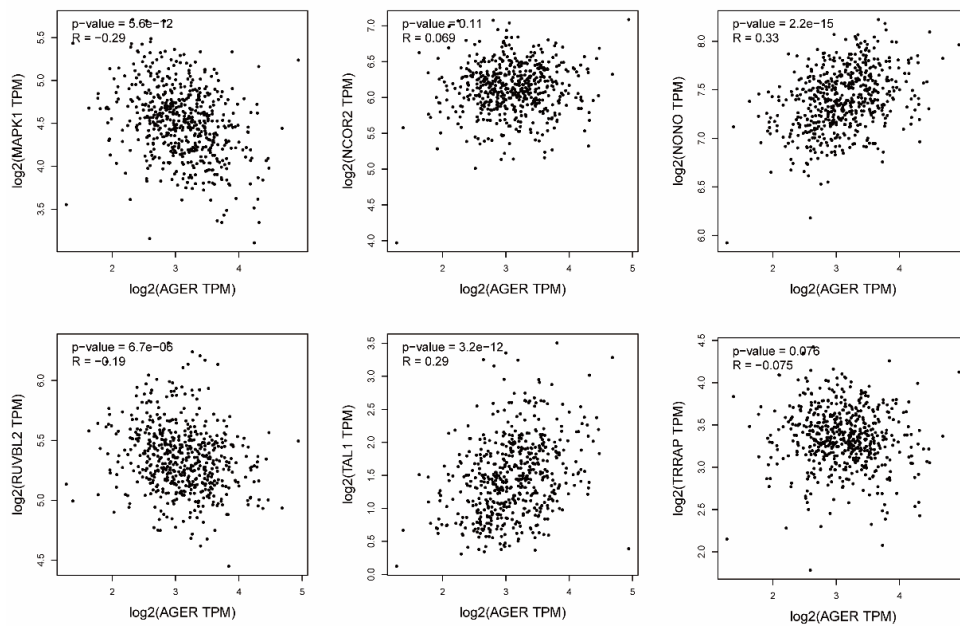

**Figure S6** Correlation analysis between *MAPK1*, *NCOR2*, *NONO*, *RUVBL2*, *TAL1* or *TRRAP*, and *AGER* in skin was performed using GEPIA2 web server.

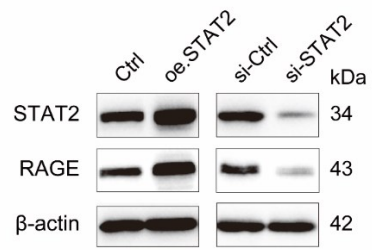

**Figure S7** Western blot analysis of STAT2, RAGE and  $\beta$ -actin protein levels in HaCaT cells after indicated treatment.

**Table S1. Plasmid information.**

| Plasmid                | Source  |
|------------------------|---------|
| pcDNA3.1-MDM2 plasmid  | unibio  |
| pcDNA3.1-STAT2 plasmid | unibio  |
| PRL-TK plasmid         | Tsingke |
| PGL3-Basic plasmid     | Tsingke |
| RAGE promoter plasmid  | Tsingke |

**Table S2. Sequences of siRNA.**

| Gene               | Sequence                     |
|--------------------|------------------------------|
| Species: Human     |                              |
| si-STAT2-Sense     | GGCUGACUUCACUAAGCGA (dT)(dT) |
| si-STAT2-Antisense | UCGCUUAGUGAAGUCAGCC (dT)(dT) |

**Table S3. Sequences of qRT-PCR primers.**

| Gene           | Sequence                |
|----------------|-------------------------|
| Species: Human |                         |
| GAPDH-Foward   | GTCTCCTCTGACTTCAACAGCG  |
| GAPDH-Reverse  | ACCACCCTGTTGCTGTAGCCAA  |
| RAGE-Foward    | CACCTTCTCCTGTAGCTTCAGC  |
| RAGE-Reverse   | AGGAGCTACTGCTCCACCTTCT  |
| MDM2-Foward    | TGTTTGGCGTGCCAAGCTTCTC  |
| MDM2-Reverse   | CACAGATGTACCTGAGTCCGATG |
| Species: Mouse |                         |
| GAPDH-Foward   | GTCTCCTCTGACTTCAACAGCG  |
| GAPDH-Reverse  | ACCACCCTGTTGCTGTAGCCAA  |
| RAGE-Forward   | GCCACTGGAATTGTCGATGAGG  |
| RAGE-Reverse   | GCCACTGGAATTGTCGATGAGG  |
